# Supplementary material
Source: publisher figshare collection journal article supplement (https://karger.figshare.com/articles/dataset/_/5123536)
Supplement: Supplementary file 1 [file 1]

Archive with 6 entries (6 files):
- 000338599_sm_Movie_1.avi
- 000338599_sm_Movie_2.avi
- 000338599_sm_Movie_3.avi
- 000338599_sm_Movie_4.avi
- 000338599_sm_Movie_5.avi
- 000338599_sm_Suppl_Material.pdf
