# Supplementary material
Source: publisher figshare collection journal article supplement (https://karger.figshare.com/articles/dataset/_/5123536)
Supplement: Supplementary file 1 [file 1 › 000338599_sm_Suppl_Material.pdf]

## **Supplementary Materials**

**Movie 1.** Migration and process formation by Neuro-2a cells cultured on laminin in serum-free medium. See legend of Fig. 2a. One second in the movie represents 2 h.

**Movie 2.** Rear-side localization of the centrosome (green) in migrating and process forming Neuro-2a cells. Cells were transfected with AKAP450-GFP. See legend of Fig. 4a. One second in the movie represents 1 h.

**Movie 3.** Rear-side localization of the centrosome (green) in migrating Neuro-2a cells. Cells were transfected with AKAP450-GFP. See legend of Fig. 4b. One second in the movie represents 1 h.

**Movie 4.** Migration of spastin-depleted Neuro-2a cells. See legend of Fig. 7a. One second in the movie represents 1 h.

**Movie 5.** Migration of control Neuro-2a cells. See legend of Fig. 7b. One second in the movie represents 1 h.
